# Supplementary material
Source: PubMed Central journal article supplement (PMC3434344)
Supplement: cr2012114x3.pdf [file cr2012114x3.pdf]

## LIF(-) 7 days

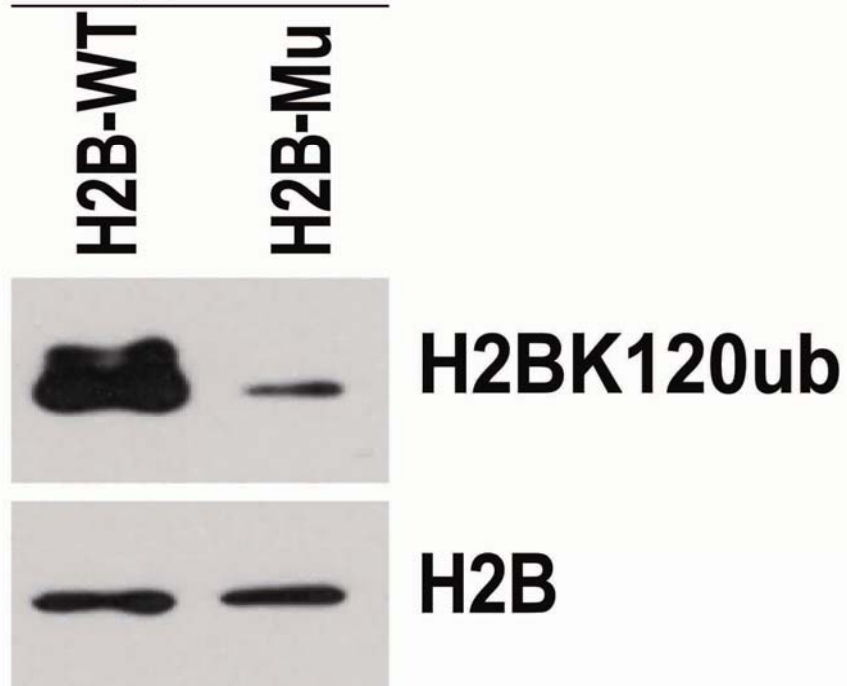

**Supplementary information, Figure S3** The H2BK120R mutant inhibits endogenous H2BK120ub levels compared with H2B-WT. ESCs were cultured without LIF for 7 days and analyzed by western blotting with H2BK120ub and H2B antibodies as indicated.
