# Supplementary material
Source: PubMed Central journal article supplement (PMC3434344)
Supplement: cr2012114x5.pdf [file cr2012114x5.pdf]

## **Supplementary information, Data S1** Materials and Methods

### *Culture of embryonic stem cells (ESCs)*

IVP-ES1 mouse ESCs were cultured under standard conditions according to previous reports [1, 2].

### *Preparation of embryoid bodies (EBs)*

EBs were prepared according to the method of Zhang and Jin, 2009 [2]. Three hundred ES cells were suspended in ES cell culture medium with LIF for 3 days. EB colonies were subsequently transferred to 60 mm<sup>2</sup> dishes and further cultured for the indicated times in ES medium without LIF.

### *Western blotting*

Western blotting was performed according to previous reports [3].

EBs and ES cells were lysed in RIPA lysis buffer (50 mM Tris-HCl, pH 7.4, 150 mM NaCl, 1% NP-40, and 0.1% SDS). The protein concentration was measured with a BCA Assay Kit (Calbiochem). Then, the proteins were resolved by SDS-PAGE using a 15% gel. After electrophoresis, proteins were transferred onto PVDF membranes (Amersham) and hybridized with primary antibodies at the following dilutions: RNF20/BRE1 (Novus Biologicals; 1:2,000), RAD6 (Santa Cruz Biotechnology; 1:2,000), H2Bub (Medimabs; 1:2,000), H3K4me3 (Abcam, 1:2,000), Nanog (Santa Cruz Biotechnology, 1:2,000), Oct4 (Abcam, 1:2,000) and actin (Zhongshan Golden Bridge; 1:2,000). The HRP-labeled secondary antibodies (Zhongshan Golden Bridge) were all used at a dilution of 1:2,000. An ECL detection system (Amersham) was used to detect the signals on the membranes.

### *Constructs*

Mouse pCAG-H2B-GFP was constructed by cloning the full-length H2B cDNA, which was amplified from mouse ES cells, into the pCAG-GFP vector. The pCAG-H2BK120R-GFP mutant plasmid was produced by introducing a mutation at lysine 120 using a mutation kit (TaKaRa).

#### *Alkaline phosphatase (AP) staining*

AP staining was performed according to the manufacturer's instructions (Cell Biolabs).

#### *RT-PCR*

The RT-PCR assay was performed according to previous studies [3]. ES cells ( $4 \times 10^6$ ) were lysed with TRIzol reagent (Invitrogen) to isolate total RNA according to the manufacturer's instructions. In total, 5  $\mu\text{g}$  of total RNA was reverse transcribed into cDNA in a volume of 20  $\mu\text{L}$  using reverse transcriptase M-MLV (TaKaRa). For each 25  $\mu\text{L}$  PCR reaction, 1  $\mu\text{L}$  of cDNA was used for 20-25 cycles. All of the PCR products were analyzed by electrophoresis in a 2% agarose gel, and the gel was stained with ethidium bromide and photographed.

#### *Chromatin immunoprecipitation (ChIP)*

ChIP analysis was performed according to the published protocols of Upstate and Ni et al., 2006 [3].

#### **References**

- 1 Takahashi K, Yamanaka S. Induction of pluripotent stem cells from mouse embryonic and adult fibroblast cultures by defined factors. *Cell* 2006; 126:663-676.
- 2 Zhong X, Jin Y. Critical roles of coactivator p300 in mouse embryonic stem cell differentiation and Nanog expression. *J Biol Chem* 2009; 284:9168-9175.
- 3 Ni JQ, Liu LP, Hess D, Rietdorf J, Sun FL. Drosophila ribosomal proteins are associated with linker histone H1 and suppress gene transcription. *Genes Dev* 2006; 20:1959-1973.
